## Critical Arterial Stenosis Revisited

Joseph P Archie, Jr, PhD, MD

Corresponding: 4030 Cardinal at North Hills St, #535

Raleigh, North Carolina 27609

[josephparchie@gmail.com](mailto:josephparchie@gmail.com)

[919-389-9249](tel:919-389-9249)

Category: Original Research, Clinical Hemodynamics

Short Title: Critical Arterial Stenosis

Key Word: stenosis, artery, carotid, renal

Conflict of interest statement: This research did not receive any specific grant or funding agencies in the public, or non-profit sectors.

### Abstract

**Introduction.** Stenosis of an organ/tissue primary artery may produce ischemia, malfunction or only reduce blood flow reserve. Despite incomplete hemodynamic understanding of critical arterial stenosis, degree of diameter stenosis continues to be an index for patient management.

This study aims to use conservation of energy to; quantitate the arterial pressure gradient produced by stenosis, determine organ/tissue perfusion pressure, blood flow and reserve as a function of degree of diameter stenosis and identify critical diameter stenosis, if it exists.

**Methods.** A three-component system is considered, parallel stenotic artery and collateral circulation supplying organ/tissue. Energy analysis of arterial stenosis gives the pressure gradient produced and stenosis vascular resistance. Organs/tissues intrinsically autoregulate

blood flow when perfusion pressure is greater than threshold value. System energy analysis defines collateral vascular resistance and gives perfusion pressure, blood flow and reserve as a function of diameter stenosis. Renal and internal carotid artery (ICA) stenosis provide numerical examples.

**Results.** The magnitude of stenosis energy dissipation,  $K$ , is a fourth power function of stenosis diameter with a steep slope between 65% and 80%, ( $K = 67$  to  $625$ ). Systems without collaterals,  $C = 0$ , have discrete critical stenosis values within this range. Renal critical stenosis is 74% ( $K = 233$ ). Systems with poor collaterals,  $C < 1$ , have critical stenosis from 65% to 99% depending on collateral magnitude. Critical ICA stenosis begins at 70% and up to 99%, ( $K = 132$  to  $\infty$ ). Degree of cerebral ischemia is non-linearly inversely proportional to collateral magnitude,  $C$ . Systems with good collateral circulation,  $C > 1$ , do not have critical stenosis, including the ICA (cerebral hemisphere). In these systems stenosis progression reduces blood flow reserve but does not produce ischemia.

**Conclusion.** Critical diameter arterial stenosis may or may not exist for specific organ/tissue systems depending on the magnitude of collateral circulation.

## Introduction

In 1981 we reported that critical internal carotid artery (ICA) diameter stenosis, based on intraoperative blood flow measurements, was approximately 60%<sup>1</sup>. Several discussants correctly pointed out that the relationship between blood flow and pressure make quantification of critical arterial stenosis difficult and one considered critical arterial stenosis “pursuit of an impossible goal”. Our 60% value intuitively seemed low. In retrospect, our study

failed because collateral blood flow reduced measured ICA flow and the calculated critical stenosis value. Decades later the critical stenosis problem remains inadequately analyzed as does the effect of arterial stenosis on organ/tissue hemodynamics in general. One might expect success using modern computational fluid dynamics (CFD) to numerically solve a complex fluid mechanics problem that includes stenosis turbulent flow, but this is not the case<sup>2,3</sup>. The observation that pipe diameter produces a decrease in pressure (pressure gradient) in proportion to the lumen area was made by Poiseuille centuries ago. Much later It was found that decreasing stenosis area in animal arteries increases pressure gradient<sup>4,5</sup>. Some investigators recognized the value of using conservation of energy to capture stenosis turbulence<sup>6,7</sup> but fail to consider critical stenosis in the context of recipient organ/tissue. Standard CFD based on the law of conservation of momentum Navier-Stokes equations inadequately quantitates turbulent flow even when including Reynolds stresses. Conversely, the law of conservation of energy encompasses turbulence and may provide a solution for the effect of arterial stenosis on specific body organ/tissues. Recent studies demonstrate that stenosis produced turbulent kinetic energy (TKE) can be quantitatively measured by magnetic resonance imaging (MRI), is not reversible back to pressure energy and dissipated locally<sup>8,9</sup>. Directly measured aortic valve and vessel stenosis pressure gradients correlate well with MRI measured TKE dissipation<sup>10</sup>. This information plus the necessity to consider arterial stenosis in the context of specific artery-collateral-organ/tissue systems are the basis for this study.

This study aims to use conservation of energy to; quantitate the arterial pressure gradient produced by stenosis, determine organ/tissue perfusion pressure, blood flow and reserve as a

function of degree of diameter stenosis and identify critical diameter arterial stenosis, if it exists.

## Methods

**Hemodynamic Energy.** Energy generated by the left ventricle and delivered to systemic organs/tissues is  $\approx 99\%$  pressure energy and  $\approx 1\%$  kinetic energy. For cardiac output of 4.5 liters/minute with mean aortic pressure 100 mmHg, pressure energy is  $\approx 1.0$  watts/sec versus 0.011 watts/sec of kinetic energy. In normal body systems, blood flow is laminar and hemodynamic energy is primarily dissipated efficiently in body organs/tissues by parallel small artery branches, arterioles and pre-capillaries. Conversely, arterial stenosis converts pressure energy to TKE that is dissipated, reducing organ/tissue perfusion pressure. The hemodynamics of turbulent blood flow is poorly understood and incompletely modeled by both CFD<sup>3</sup> and classical fluid dynamics<sup>11</sup>. Prior clinical studies of critical arterial stenosis using laminar flow or empirical approximations also fail<sup>12,13</sup>. Conservation of energy includes turbulence, circumventing the problem, an opportunity to succeed.

**Assumptions and Definitions.** Blood is assumed to be an incompressible, homogenous and isotropic fluid. Volume blood flows,  $Q$ , and pressures,  $P$ , are mean values. Systemic blood pressure,  $P_a$ , is arterial pressure minus venous pressure, a normalization. The artery has cylindrical lumen area  $A$  (diameter  $D$ ) with a concentric stenosis of lumen area  $a$  (diameter  $d$ ). System hemodynamic input pressure energy is  $P_a Q$ , and the 1% input kinetic energy is neglected. Vascular resistance,  $R$ , a defined calculated variable, is pressure gradient,  $\Delta P$ , divided by flow,  $Q$ , or  $\Delta P = RQ$ . Pressure energy is  $Q\Delta P = RQ^2$  and energy density is  $\Delta P = RQ$ . A three-

component energy system is analyzed; stenotic artery anatomically in parallel with collaterals supplying organ/tissue blood flow. Hemodynamic energy is dissipated by the vascular resistances; stenosis,  $R_s$ , collateral,  $R_c$ , and organ/tissue,  $R_o$ . Fractional percent diameter stenosis (F%DS, X) is the independent variable.

Numerical calculations are centimeter, gram, second (CGS) units. Pressure is mmHg (1mmHg = 1,333 dyne/cm), blood flow is cm/sec, energy is dyne cm/sec (erg/sec) =  $10^{-7}$  watts and blood density is 0.994 g/ml.

Arterial Stenosis Energy Dissipated and Vascular Resistance,  $R_s$ . Conservation of mass requires that volume blood flow ( $Q$  = mean velocity  $V$  times area  $A$ ) in the normal artery segment equal that in the stenosis lumen,  $AV_1 = aV_2$  and  $Q = AV_1 = aV_2$ . Conservation of energy requires that stenosis produced kinetic energy equal the decrease in pressure energy. For a straight uniform diameter artery with a focal stenosis the transfer of pressure energy to kinetic energy is  $(P_1 - P_2)Q_s = Q_s (V_2^2 - V_1^2)/2$ , where  $Q_s$  is blood flow,  $A$  is normal lumen area,  $V$  is mean blood flow velocity and location 1 is upstream from a stenosis at location 2. Assuming a concentric round stenosis with lumen area  $A$  (diameter  $D$ ) and stenosis area  $a$  (diameter  $d$ ) the pressure gradient is  $\Delta P = (P_1 - P_2) = Q_s^2 [(1/a)^2 - (1/A)^2]$ . The NASCET definition of percent diameter stenosis is  $100(1 - d/D)$  and fractional percent diameter stenosis,  $X = (1 - d/D)$ . Lumen areas are,  $a = \pi d^2/4$  and  $A = \pi D^2/4$ . The stenosis generated kinetic energy density is  $\Delta P = Q_s^2 \{ [1/(1 - X)^4] - 1 \} / 2A^2 = Q_s^2 K / 2A^2$ , where  $Q_s$  is artery blood flow. The kernel  $K$  (term that contains the variable  $X$ ) is  $K = \{ [1/(1 - X)^4] - 1 \}$ , a universal measure of the magnitude of stenosis produced kinetic energy, independent of  $Q_s$ . This is given in Figure 2 as  $K$  versus  $X$ . Arterial stenosis  $K$  values between 67 and 625 correspond to fractional percent diameter

stenosis,  $X$ , values from 65% to 80% diameter stenosis (slope of curve approximately 37:1). The wide variance in stenosis produced kinetic energy is associated with a narrow range of degree of stenosis. Over 98% of stenosis produced kinetic energy is turbulent, irreversible back to pressure energy and dissipated in the stenosis zone. Vascular stenosis resistance, defined as the ratio of pressure gradient to flow, is  $R = \Delta P/Q$ . Arterial stenosis vascular resistance is  $R_s = Q_s \{ [1/(1-X)^4] - 1 \} / 2A^2 = Q_s K / 2A^2$ , where the subscript  $_s$  indicates arterial stenosis resistance and blood flow. This result, like  $K$ , stands-alone and is universally applicable to body systems.

Organ/tissue Vascular Resistance,  $R_o$ . Organ/tissues control blood flow by intrinsically autoregulating perfusion pressure energy to meet metabolic energy requirements. The lower autoregulation threshold perfusion pressure ( $P_{cut}$ ) means that organs/tissues have two blood flow zones depending on perfusion pressure. Lassen's measurements of normal human cerebral blood flow autoregulation<sup>14,15</sup> with an ischemic perfusion pressure threshold of 50mmHg is illustrated in Figure 1. Renal autoregulation lower threshold for normal glomerular filtration is  $\approx 80$ mmHg and for ischemia is  $\approx 60$ mmHg. In the autoregulation zone, vascular resistance is  $R_o = P_p / Q_n$ , where  $Q_n$  is normal blood flow and  $P_p$  is perfusion pressure. If organ/tissue  $P_p$  falls below autoregulation pressure threshold,  $P_{cut}$ , blood flow is linearly pressure dependent,  $R_o = P_{cut} / Q$ , and  $Q < Q_n$ .

Collateral Vascular Resistance,  $R_c$ . Many organs/tissues have both a primary artery and collaterals. Kidneys are essentially entirely dependent on renal artery blood flow and accessory renal arteries supply isolated kidney segments. Brain has a complex blood supply with both primary arteries and collaterals primarily the circle of Willis. Collateral vascular resistance,  $R_c$ , is

individual and organ/tissue specific, and of magnitude  $C$ . This is a result of energy conservation analysis of the complete system.

At the organ/tissue autoregulation-perfusion pressure zones interface and artery occlusion,  $X = 1.0$ , the energy density is  $P_a = (R_c + R_o)Q_n$ , or  $R_c = (P_a/Q_n - R_o)$ , where  $R_o$  can take either the autoregulation zone or the pressure dependent zone value. Choosing the latter,  $R_o = P_{cut}/Q_n$  and collateral vascular resistance is  $R_c = (P_a - P_{cut})/Q_n$ . This meets the requirement that  $R_c$  be a constant. To make this specific for systems and individuals  $R_c = (1/C)(P_a - P_{cut})/Q_n$ , where  $C$ , a measure of the magnitude of collateral blood flow potential, ranges from zero to infinity. When  $C = 0$ ,  $R_c = \infty$  (no collaterals) and when  $C = \infty$ ,  $R_c = 0$ . When  $K = \infty$ , the artery is occluded and organ/tissue perfusion pressure is due to collateral flow and clinically referred to as stump or back pressure,  $P_{stump}$ . The relationship between the magnitude of collateral vascular resistance,  $C$ , to  $P_{stump}$  is  $C = (P_{stump}/P_{cut})(P_a - P_{cut})/(P_a - P_{stump})$ . These are consistent with the three-component system's pressure and blood flow end-points,  $C$  from 0 to  $\infty$  and  $P_{stump}$  from 0 to  $P_a$ .

**Three Component Hemodynamic Energy.** The parallel stenotic artery and collateral pressure total energy supplied to organ/tissue is  $(P_a - P_p)Q = \Delta PQ = R_t Q^2$ , where  $R_t = (R_s R_c)/(R_s + R_c)$ . Organ/tissue received energy is  $R_o Q^2$  (energy density  $R_o Q$ ) where  $R_o = P_p/Q_n$  in the autoregulation perfusion pressure zone and  $R_o = P_{cut}/Q_n$  in the lower perfusion pressure dependent zone. Artery vascular resistance  $R_s$  contains  $F\%DS (X)$ , the independent variable. Solutions are organ/tissue perfusion pressure and blood flow as functions of percent diameter stenosis and include critical arterial stenosis values if they exist. Critical stenosis,  $X = X_{crit}$ , occurs if stenotic and collateral energy dissipation equals organ/tissue lower autoregulation perfusion pressure energy threshold.

## Results

**Stenosis Energy Dissipation and Vascular Resistance.** Dissipated stenosis energy density is  $\Delta P = Q_s^2 K / 2A^2$ , where  $Q_s$  is artery blood flow and  $K = \{[1/(1 - X)^4] - 1\}$ , a universal measure of the magnitude of arterial stenosis produced TKE. Figure 2 illustrates K versus X, (F%DS). While the wide K variance for a narrow range of degree of stenosis is a stand-alone result, it is key to organ/tissue systems analysis. Arterial stenosis vascular resistance is  $R_s = Q_s K / 2A^2$ .

**Collateral Vascular Energy and Resistance.** This is a constant, specific for each organ/tissue system and individuals. At the organ/tissue autoregulation-perfusion pressure zones interface and artery occlusion,  $X = 1.0$ , the energy density is  $P_a = (R_c + R_o)Q_n$ , or  $R_c = (P_a/Q_n - R_o)$ , where  $R_o$  can take either the autoregulation zone or the pressure dependent zone value. For the latter,  $R_o = P_{cut}/Q_n$  and collateral vascular resistance is  $R_c = (P_a - P_{cut})/Q_n$ . This meets the requirement that  $R_c$  be a constant. To make this specific for systems and individuals  $R_c = (1/C)(P_a - P_{cut})/Q_n$ , where C, a measure of the magnitude of collateral blood flow potential and ranges from zero to infinity. When  $C = 0$ ,  $R_c = \infty$  (no collaterals) and when  $C = \infty$ ,  $R_c = 0$ . When  $K = \infty$ , the artery is occluded and organ/tissue perfusion pressure is due to collateral flow and clinically referred to as stump or back pressure,  $P_{stump}$ . The relationship between the magnitude of collateral vascular resistance, C, to  $P_{stump}$  is  $C = (P_{stump}/P_{cut})(P_a - P_{cut})/(P_a - P_{stump})$ . This is consistent with the three-component system's pressure and blood flow end-points, C from 0 to  $\infty$  and  $P_{stump}$  from 0 to  $P_a$ .



Organ/tissue Perfusion Pressure and Diameter Stenosis. Conservation of energy for the three component system is  $P_a Q = (R_t + R_o)Q^2$ . When organ/tissue perfusion pressure  $P_p$  is equal to or higher than  $P_{cut}$ ,  $R_o = P_p/Q_n$  and  $Q = Q_n$ , giving  $P_p = P_a - Q_n R_t$ . With  $R_s$  and  $R_c$  the result is  $P_p = P_a - Q_n / [(2A^2/K) + CQ_n / (P_a - P_{cut})]$ . The functional relationships between organ/tissue perfusion pressure energy density,  $P_p$ , and fractional percent diameter stenosis,  $X$ , is given in Figure 3 when  $C = 0$  (no collaterals), and in Figure 4 for the kidney data (no collaterals) and Figure 5 for the cerebral hemisphere (no collaterals) examples. In Figure 5 the perfusion pressure curves in the autoregulation zone ( $P_p > P_{cut}$ ) illustrates the decrease in reserve energy density and blood flow reserve as stenosis progresses and collateral magnitudes  $C = 0, 0.33, 1.0$  and  $2.0$ .

In the perfusion pressure zone  $P_p < P_{cut}$  blood flow is proportional to  $P_p$ . Energy conservation is  $P_a = R_o Q = (P_{cut}/Q_n)Q$  where  $Q = Q_s + Q_c$ ,  $Q < Q_n$  and the slope is  $Q_n/P_{cut}$ .

When  $C > 0$  but  $< 1.0$ , the solution for  $Q$  as a function of  $X$  is a solvable quadratic not included in Figure 5. In the absence of collateral blood flow ( $C = 0$ )  $Q$  is a linear function of  $P_p$ , per the Lassen model in Figure 1.

Critical Arterial Stenosis. Critical arterial stenosis is defined as the percent diameter stenosis at which further stenosis progression reduces organ blood flow below normal into the ischemic zone. The system energy density equation  $P_a = (R_t + R_o)Q$ . When  $Q = Q_n$  and  $R_o = P_{cut}/Q_n$  and  $R_t = [(P_a/Q_n) - P_{cut}/Q_n] = (P_a - P_{cut})/Q_n$ . Because  $1/R_t = 1/R_s + 1/R_c$ ,  $1/R_t = Q_n / (P_a - P_{cut}) = [2A^2/Q_s K + KQ_n / (P_a - P_{cut})]$ . Therefore,  $[Q_n / (P_a - P_{cut})](1 - K) = [(2A^2/Q_s K) - 1]$ . Critical stenosis values occur when organ autoregulatory reserve energy dissipated arterial stenosis turbulent kinetic energy. For the three component system;  $X_{crit} = 1 - 1 / \{ [2A^2(P_a - P_{cut}) / Q_n Q_s (1 - C)] - 1 \}^{1/4}$ . When  $C = 0$ ,  $R_c = \infty$ , the absence of collateral blood flow, and  $X_{crit} = 1 - 1 / \{ [2A^2(P_a - P_{cut}) / Q_n Q_s] - 1 \}^{1/4}$ . If  $C = 1$ ,  $X_{crit}$

= 1.0, 100% or occlusion. If  $C$  is higher than 1,  $X_{crit}$  does not exist because collateral blood flow is adequate to prevent ischemia, that is, collateral blood flow is adequate to maintain organ/tissue perfusion pressure,  $P_p$  higher than  $P_{cut}$ .

Kidneys are a major solid organ with both closely autoregulated normal blood flow and essentially no collateral flow. Assuming renal artery blood flow 9.0 ml/sec, normal renal artery diameter 0.60cm, mean systemic arterial pressure 110mmHg and an autoregulation ischemic threshold pressure 60mmHg,  $X_{crit} = 0.744$  or 74.4% diameter stenosis. For a pressure threshold of 80mmHg for onset of increased renin production and glomerular filtration dysfunction, the critical diameter stenosis is 70.9%. These values have a 95% confidence interval (CI) of approximately 3% for wide variance of normal anatomic and hemodynamic variables. This is illustrated in Figure 4.

Cerebral hemispheres are major solid organs with closely autoregulated normal blood flow and highly variable between human collateral vascular resistance. In the absence of collateral blood flow and assuming normal internal carotid blood flow 6.25 ml/sec, normal diameter 0.50cm, mean systemic arterial pressure 100mmHg and autoregulation threshold 50mmHg, critical internal carotid artery (ICA) diameter stenosis is 0.704 or 70.4% with 3%CI. Based on clinically measurements mean internal carotid stump pressures is approximately 50 mmHg when normalized to  $P_a = 100$ mmHg, and cerebral collateral vascular resistance is close to hemisphere resistance,  $C = 1$ . For the approximate 50% of individuals with  $P_{stump} < 50$ mmHg ( $P_{stump}$  adjusted to  $P_a = 100$ mmHg) and collateral vascular resistance  $C < 1$ , (poor collaterals), critical ICA stenosis increases from 70% to 100% as  $C$  increases from 0 to 1.0. Conversely, if collateral blood flow is adequate to maintain normal cerebral flow with internal carotid

occlusion,  $C > 1$ , (good collaterals), system critical stenosis does not exist because cerebral perfusion pressure is higher than critical ( $P_p > P_{cut}$ ) and reserve blood flow is available. This is illustrated in Figure 5.

**Arterial Stenosis Blood Flow.** When collaterals are present, the energy relationship between collateral and arterial blood flow is  $Q_c/Q_s = R_s/R_c$  and  $Q = Q_c + Q_s$ . For example, when cerebral hemisphere perfusion pressure equal to or greater than threshold 50 mmHg, blood flow is normal and  $Q_c = Q_n - Q_s$ . The result is  $Q_c = Q_s^2 K Q_n / 2A^2 (P_a - P_{cut})$ , a quadratic with solutions for  $Q_s$ , and  $Q_c$ . This is illustrated in Figure 6 when  $C = 1.0$ . For ICA diameter stenosis of 50%, 60%, 70%, 74% and 80% the corresponding ICA blood flows ( $Q_s$  and % of normal) are 5.80ml/sec (93%), 5.41 (87%), 4.45(71%), 3.85 (62%) and 2.74 (44%). Individuals with below average collateral blood flow,  $C < 1.0$ , have a lesser decrease in ICA blood flow. For ICA stump pressure of 25 mmHg ( $C = 0.333$ ) at 70% stenosis,  $Q_s = 5.36 \text{ cm}^3/\text{sec}$  (86% of normal). Conversely, the approximate 50% of individuals with good collaterals ( $C > 1.0$  and  $P_{stump} > 50 \text{ mmHg}$ ) have a significant decrease in ICA blood flow. Similarly, these individuals will have much less energy dissipated in the stenosis zone (energy =  $P_p Q_c$ ) than those with  $C < 1.0$ . Good collateral flow reduces both stenosis pressure gradient ( $P_a - P_p$ ) and blood flow  $Q_s$  as stenosis progresses. For example, at 60% stenosis, individuals with average collaterals ( $C = 1.0$ ) have stenosis energy dissipation =  $(50\text{mmHg})(5.4 \text{ cm ml}/\text{sec}) = 270 \text{ units}$ , versus  $(35 \text{ mmHg})(4.3\text{ml}/\text{sec}) = 152 \text{ units}$ .

## Discussion

Arterial stenosis reduces recipient organ/tissue's perfusion pressure and blood flow reserve. If collaterals are absent,  $C = 0$ , there is a discrete critical stenosis value. Renal artery ischemic critical stenosis is 74%, as in Figure 4. If collaterals are poor,  $C < 1.0$ , critical stenosis for body

organ/tissues range from  $\approx 65\%$  to  $99\%$ , in proportion to collateral magnitude. For cerebral hemispheres this is  $73\%$  to  $99\%$ , as in Figure 5. If collaterals are good,  $C > 1.0$ , there are no critical values and reserve blood flow is available at occlusion, as also illustrated in Figure 5.

Turbulent vessel flow is an incompletely understood phenomena. Classical fluid mechanics is primarily based on momentum conservation that inadequately models arterial turbulence resulting in incomplete solutions, even with CFD. Conservation of energy requires stenosis TKE produce a pressure gradient. While unlikely to be original, the universal stenosis magnitude,  $K = \{[1/(1-X)^4 - 1]\}$ , where  $X$  is  $F\%DS$ , is energy conservation valid. Of interest, the earlier proposed relationship between stenosis produced pressure gradients and stenosis area turns out to be area squared, diameter to the forth power. The relationships between organ/tissue perfusion pressure and blood flow as a function of  $X$  are illustrated in Figures 3, 4 and 5. Critical arterial stenosis, if exists, depends on the magnitude of collateral blood flow.

The defined magnitudes of stenosis energy,  $K$ , and collateral circulation,  $C$ , simplify presenting and understanding result. The  $K$  variable is specific for an organ/tissue system's degree of artery stenosis. While  $K$  ranges from zero to infinity, the independent variable,  $X$ , ranges from zero to one, or  $0\%$  to  $100\%$  diameter stenosis. The  $C$  variable is specific between individuals and within an individual's organ/tissue systems. Collateral circulation is a major determinant of  $X_{crit}$ . In the absence of collateral circulation  $C = 0$ ,  $X_{crit}$  occurs when dissipated arterial stenosis energy negates autoregulation reserve energy, as for renal. When collateral circulation is present with increasing  $C$  magnitude up to  $1.0$ , ( $C > 0$ ,  $C < 1.0$ ),  $X_{crit}$  increases up to  $0.99$ , ( $99\%$  stenosis). When collateral circulation is adequate to prevent organ/tissue

autoregulation from being depleted and  $C > 1.0$  if the artery occludes, blood flow is adequate to prevent ischemia and provide reserve.

**Potential Clinically Useful Results.** Much of physical and biological science and resulting technology are based on models. They are considered good, but not necessarily correct if they are useful. A model is useful for both understanding and guidance for future investigation if it represents reality based on and consistent with clinical observation<sup>18</sup>.

Arterial stenosis generated kinetic energy magnitude,  $K$ , is applicable to any artery, as is stenosis vascular resistance. It can be easily modified for percent area stenosis allowing other stenosis geometries but not length. Collateral magnitude,  $C$ , is body organ/tissue system specific and individual specific for collateral blood flow potential. Critical arterial stenosis is a function of many variables including systemic arterial pressure. Hypertension may be beneficial in protecting organs/tissue with no or poor collaterals and arterial stenosis from ischemia. Common femoral/external iliac arteries likely have poor collaterals and may have critical stenosis values. Conversely, at rest an isolated superficial femoral artery stenosis has no critical value or produce ischemia, even with occlusion. However, exercise increases lower extremity metabolic energy requirements and collateral blood flow producing ischemic symptoms.

Progressive stenosis decreases artery blood flow,  $Q_s$ , in proportion to the magnitude of collateral potential, as in Figure 6. Degree of arterial stenosis determined from ICA ultrasound velocities measurements may be underestimated, particularly if collateral flow is good. If degree of stenosis accurately measured by imaging is significantly higher than that estimated by ultrasound velocities, collateral flow is probably good. This may have some bearing on the important clinical problem of determining stroke risk and management recommendations for

individuals with asymptomatic ICA stenosis. Good collateral blood flow potential is predicted to both prevent cerebral ischemia, even if the ICA occludes, and reduce stenosis zone energy dissipation. The magnitude of turbulent energy dissipation may impact stenosis plaque stability. A decrease in ICA plaque zone TKE is potentially a further asset of good collaterals in individuals with asymptomatic carotid arterial stenosis.

**Limitations, Assumptions.** While results appear complex, the analysis is relatively simple, algebraic without calculus or CFD. Blood flow and pressure are assumed to be steady, not pulsatile and out of phase. The validity of using turbulent kinetic energy produced by arterial stenosis to determine stenosis pressure gradient was confirmed by MRI for the aortic valve and phantom vessels<sup>8-10</sup>. While kinetic energy in normal arteries is laminar, mild stenosis of 30% - 50% diameter produce almost entirely turbulent kinetic energy<sup>19,20</sup>. Prior to these findings several attempt to describe arterial stenosis hemodynamics based on energy revert to a laminar flow momentum models or use empirical/experimental estimates to inadequately deal with turbulence<sup>2,4,6</sup>. Similar incomplete results were obtained using CFD turbulence models<sup>3</sup>.

Normal artery-collateral-organ/tissue systems have efficient laminar blood flow. The standard for estimating transition from laminar to turbulent flow is Reynolds number,  $Rn$ <sup>11</sup>. For steady flow in a pipe transition  $Rn$  is 2000 to 2500. Based on Womersley number<sup>21</sup> and turbulent energy cascade transition<sup>22</sup>, vessel turbulent  $Rn$  are 400 to 500, close to the laminar  $Rn$  for renal and ICA examples. Depending on magnitude, stenosis dissipated TKE may clinically produce an audible bruit (frequency near 20 cycles/second) and/or a palpable thrill.

Mean systemic arterial pressure is normalized to include organ/tissue venous pressure. Numerical values for renal and ICA examples are established normal resting values for blood

flow (mean velocities 30-36 cm/sec), arterial diameters and systemic pressure. The kidney autoregulation perfusion pressure thresholds of 60 mmHg for ischemia and 80mmHg for renin and glomerular filtration of 80 mmHg are established average values<sup>23-26</sup>. The cerebral hemisphere autoregulation lower threshold of 50mmHg is based on Lassen<sup>14,15</sup>.

**Conclusions.** Critical arterial stenosis is a discrete value for organs/tissues with no collateral flow. Those with poor collaterals have a range of increasing critical diameter stenosis values with stenosis progression up to arterial occlusion depending on collateral magnitude. Organs/tissue systems with good collaterals do not have critical stenosis. They have blood flow reserve that decreases with stenosis progression but remains available if the artery occludes.

## References

1. Archie JP, Feldtman RW. Critical stenosis of the internal carotid artery. *Surgery* 1981;89:67-72.
2. Sia, FS, Zhao X, Li R, Zhang Y, Chong W, He I, Chen Y. Evaluation of the carotid artery stenosis based on minimization of mechanical energy loss of the blood flow. *J Eng Med* 2016;230;1051-58.
3. Lopes D, Puga H, Teixeira J, Lima R. Blood flow simulations in patient-specific geometries of the carotid artery: A systemic review. *J Biomech* 2020; doi/10.1016/j.jbiomech.2020.110019.
4. Young DF, Cholrin NR, Kirkeeide RL, Roth AC. Hemodynamics of arterial stenosis at elevated flow rates. *Circ Res* 1977;41:99-102.
5. Mann FC, Hemick JF, Essex HE, Blades EJ. The effect of blood flow and decreasing lumen of a blood vessel. *Surgery* 1938;4:249-54.
6. Young DF, Cholvin NR, Roth AC. Pressure drop across artificially induced stenosis in the

- femoral artery of dogs. *Circ Res* 1995;36:735-43.
7. Berguer R, Hwang NHC. Critical arterial stenosis: A theoretical and experimental solution. *Ann Surg* 1974; 180:39-50.
  8. Ha H, Lantz J, Ziegler M, Casas B, Karlsson M, Dyrerfeldt P, et al. Turbulent kinetic energy assessed by multipoint 4-dimensional flow magnetic resonance imaging provides additional information relative to echocardiography for the determination of aortic stenosis severity. *Scientific Reports* 2016; doi:10.1038/srep46617.
  9. Casas B, Lantz J, Dyrerfeldt B, Ebberts T. 4D flow MRI-based pressure loss estimation in stenotic flow: Evaluation using numerical simulations. *Magn Reson Med* 2016;75:1808-1821.
  10. Gulan V, Binter C, Kozerke S, Halzner M. Shear-scaling-based approach for irreversible energy loss estimation in stenotic aortic flow – An in vitro study. *J Biomech* 2017; doi:10.1016/j.jbiomech.2017.03.006.
  11. *Blood Flow in Arteries*, McDonald, DA. Southampton: Camelot Press Ltd. Second Edition, 1994.
  12. May AG, DeWeese JA, Rob CG. Hemodynamic effects of arterial stenosis. *Surgery* 1963; 53:513-24.
  13. Berman SS, Bernhard VM, Ely WK, McIntyre KE, Erdoes LS, Hunter GC. Critical carotid stenosis: Diagnosis, timing of surgery and outcome. *J Vasc Surg* 1994; 20:499-510.
  14. Lassen NA. Cerebral blood flow and oxygen consumption in man. *Physiol Rev* 1959; 39:183-238.
  15. Lassen NA, Christensen MS. Physiology of cerebral blood flow. *Br J Anesth* 1976;48:719-34.
  16. Moore WS, Hall AD. Carotid artery back pressure. A test of collateral tolerance to



temporary carotid occlusion. Arch Surg 1969;99:702-10.

17. Archie JP. A fifteen year experience with carotid endarterectomy after a formal operative protocol requiring highly frequent patch angioplasty. J Vasc Surg 2000;31:724-35.

18. Hoffman JIE. Will the real ventricular architecture please stand up? Physiol Rep 2017; doi:10.14814/phy.2.13404.

19. Youchareon W., Young DF. Initiation of turbulence in models of arterial stenosis. J Biomech 1979;12:185-96.

20. Sagar KM, Tupin S, Rashad S, Endo T, Nilzuma K, Tominaga T et al. Physiologic blood flow is turbulent. Scientific Reports 2020; 10: #15492

21. Banerjee MK, Ganguly R, Dalta A. Effect of pulsatile flow waveform and Womersley number on flow in stenosed arterial geometry. International Scholarly Research Notices 2021. doi: 10.5402/2012/853056.

22. Hale JF, McDonald DA, Womersley JR. Velocity profiles of oscillating arterial flow, some calculations of viscous drag and the Reynolds number. J Physiol 1955; 128:629-640.

23. Inscho EW. Mysteries of renal autoregulation. Hypertension 2009;53:299-306.

24. Simon G. What is critical renal artery stenosis? Am Heart J 2000;13:1189-93.

25. Carlstrom M, Wilcox CS, Arendshorst WJ. Renal autoregulation in health and disease. Physical Rev 2015;95:405-511.

26. Kurtz A. Control of renin synthesis and secretion. Am J Hypertension 2012;25:830-47.

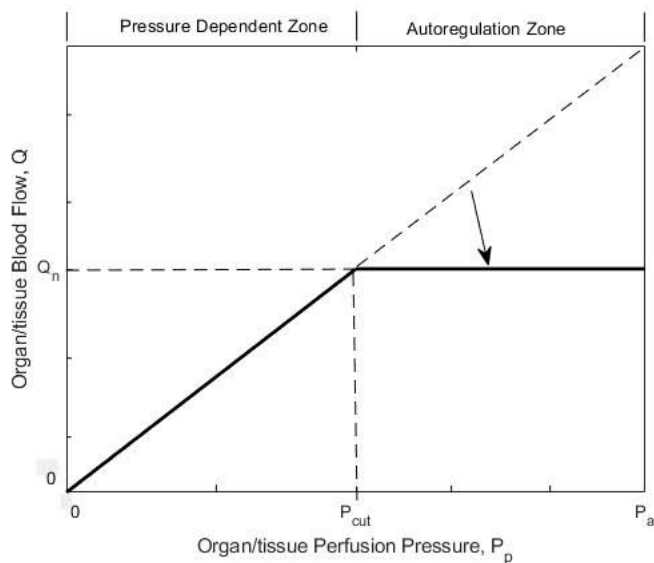

Figure 1. Schematic of Lassen cerebral blood flow autoregulation when organ/tissue perfusion pressure,  $P_p$ , is greater than pressure threshold,  $P_{cut}$ . Normal blood flow is  $Q_n$ .

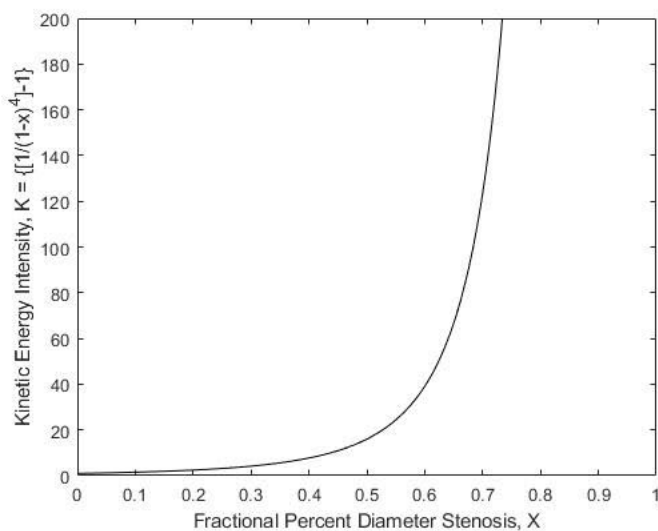

Figure 2. Arterial stenosis produced magnitude of dissipated energy,  $K$ , as function of fractional percent diameter stenosis,  $X$ .

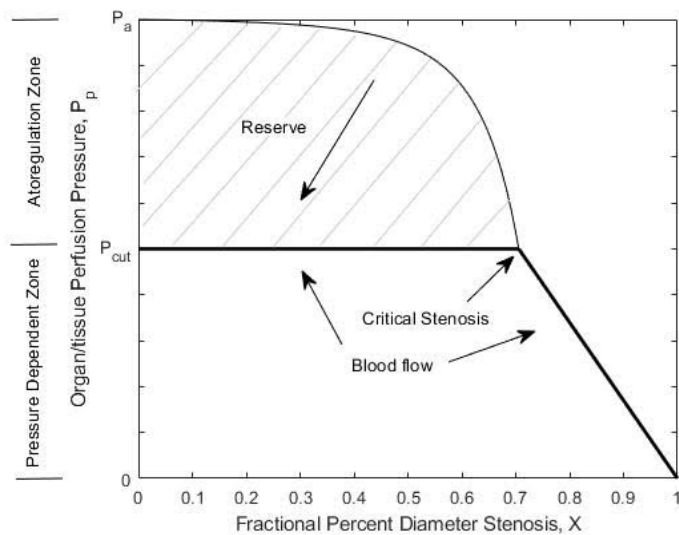

Figure 3. Energy solution for organ/tissue perfusion pressure and blood flow versus fractional percent diameter stenosis,  $X$ , in the absence of collaterals. Stenosis is critical when  $P_p$  reaches  $P_{cut}$ . Actual blood flow has heavy lines.

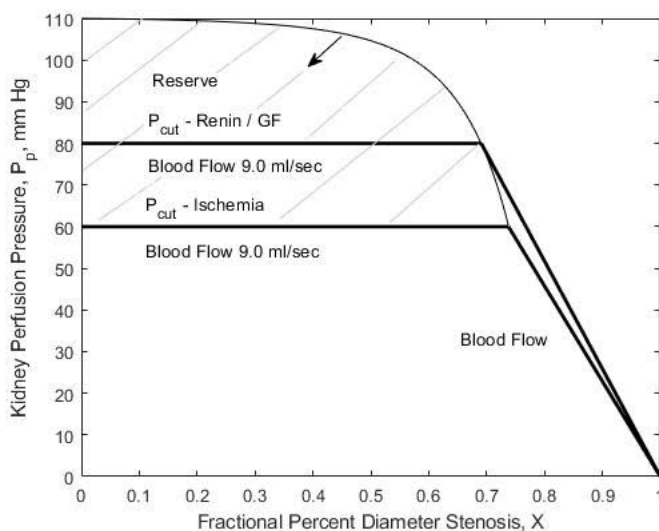

Figure 4. Numerical solution for kidney with two critical stenosis values, ischemia (74%) and glomerular filtration (71%). Actual blood flow has heavy lines.

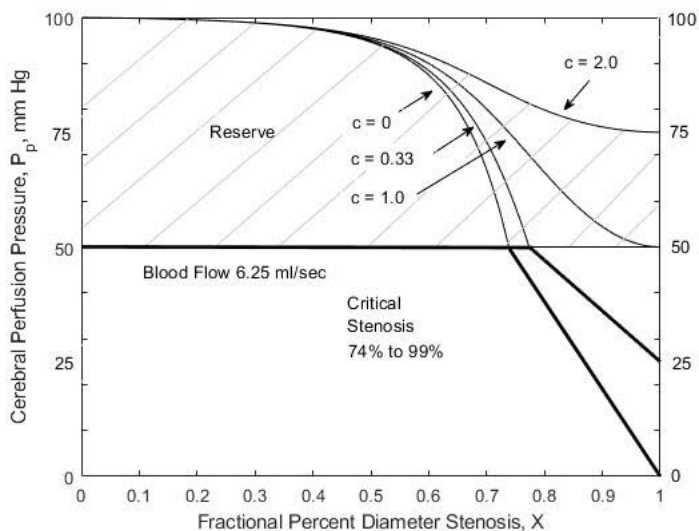

Figure 5. Numerical solution for cerebral hemisphere. Collateral blood flow potential determines critical stenosis values from 70% to 99% as collateral magnitude  $C$  increases from 0 to 1.0. There is no critical stenosis when  $C > 1.0$  and collaterals add to blood flow reserve. Blood flows that become ischemic have heavy lines. Curves are perfusion pressure and blood flow reserve.

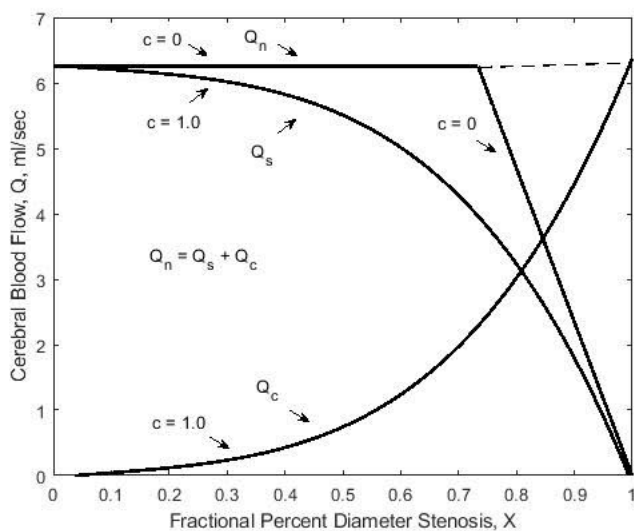

Figure 6. The two components of organ/tissue blood flow, stenotic artery,  $Q_s$ , and collateral  $Q_c$ , as a function of degree of stenosis when collateral magnitude  $C = 1.0$ . When  $C = 0$ ,  $Q_c = 0$ .
